# Supplementary material for: Photolysis of brominated flame retardants in textiles exposed to natural sunlight
Source: Royal Society of Chemistry journal article supplement (doi:10.1039/c3em30887a), 2013-01-01
Supplement: c3em30887a.pdf [file c3em30887a.pdf]

**Electronic supplementary information (ESI)**

AUTHORS: Natsuko Kajiwara <sup>\*a</sup>, Jennifer Desborough <sup>b</sup>, Stuart Harrad <sup>b</sup>, Hidetaka Takigami <sup>a</sup>

<sup>a</sup>Center for Material Cycles and Waste Management Research, National Institute for Environmental Studies, 16-2 Onogawa, Tsukuba, Ibaraki 305-8506, Japan

<sup>b</sup>School of Geography, Earth & Environmental Sciences, University of Birmingham, Birmingham, B15 2TT, UK

MANUSCRIPT TITLE: Photolysis of brominated flame retardants in textiles exposed to natural sunlight

Total number of pages: 4

Number of tables: 1

Number of figures: 2

Table S1. Concentrations (ng/kg) of PBDEs and PBDFs detected in textile samples exposed to sunlight

| Congener                                      | day 0   | day 21  | day 49  | day 77  | day 105 | day 133 | day 161 | day 189 | day 217 | day 245 | day 273 | day 301 | day 329 | day 357 | day 371 |
|-----------------------------------------------|---------|---------|---------|---------|---------|---------|---------|---------|---------|---------|---------|---------|---------|---------|---------|
| <b>Polybrominated diphenyl ethers (PBDEs)</b> |         |         |         |         |         |         |         |         |         |         |         |         |         |         |         |
| di-BDEs #7                                    | nd      |
| di-BDEs #15                                   | nd      |
| tri-BDEs #17                                  | nd      |
| tri-BDEs #28                                  | nd      |
| tetra-BDEs #49                                | nd      |
| tetra-BDEs #71                                | 0.050   | 0.060   | 0.062   | 0.057   | 0.067   | 0.055   | 0.057   | 0.049   | 0.049   | 0.049   | 0.049   | 0.045   | 0.044   | 0.043   | 0.045   |
| tetra-BDEs #66                                | nd      |
| tetra-BDEs #77                                | nd      |
| penta-BDEs #100                               | nd      | 0.010   | 0.011   | 0.011   | 0.014   | nd      | nd      | nd      | nd      | nd      | 0.010   | nd      | nd      | nd      | nd      |
| penta-BDEs #119                               | nd      | 0.010   | nd      | nd      | nd      | nd      |
| penta-BDEs #99                                | 0.077   | 0.089   | 0.088   | 0.081   | 0.098   | 0.083   | 0.083   | 0.074   | 0.075   | 0.071   | 0.081   | 0.075   | 0.071   | 0.075   | 0.073   |
| penta-BDEs #85                                | nd      |
| penta-BDEs #126                               | nd      |
| hexa-BDEs #138                                | nd      |
| hexa-BDEs #154                                | 0.026   | 0.032   | 0.034   | 0.029   | 0.036   | 0.030   | 0.034   | 0.030   | 0.029   | 0.031   | 0.037   | 0.038   | 0.034   | 0.035   | 0.041   |
| hexa-BDEs #153                                | 0.16    | 0.17    | 0.18    | 0.17    | 0.19    | 0.17    | 0.17    | 0.15    | 0.15    | 0.15    | 0.17    | 0.16    | 0.14    | 0.15    | 0.16    |
| hepta-BDEs #184                               | nd      | 0.40    | nd      | nd      | nd      | nd      |
| hepta-BDEs #183                               | 0.66    | 0.81    | 0.81    | 0.72    | 0.88    | 0.70    | 0.73    | 0.67    | 0.63    | 0.65    | 0.69    | 0.58    | 0.65    | 0.71    | 0.69    |
| hepta-BDEs #191                               | 100     | 72      | 53      | 66      | 70      | 59      | 80      | 56      | 78      | 67      | 10      | 27      | 29      | 24      | 23      |
| octa-BDEs #196                                | 37      | 43      | 33      | 32      | 41      | 33      | 94      | 62      | 140     | 94      | 42      | 30      | 27      | 38      | 38      |
| octa-BDEs #197                                | 940     | 1,200   | 1,100   | 1,200   | 1,500   | 1,200   | 4,700   | 3,300   | 3,800   | 3,500   | 1,800   | 1,300   | 1,300   | 1,100   | 1,100   |
| nona-BDEs #207                                | 1,400   | 1,300   | 1,400   | 1,400   | 1,600   | 1,300   | 2,000   | 1,800   | 1,700   | 1,700   | 1,300   | 1,300   | 1,300   | 1,200   | 1,200   |
| deca-BDEs #206                                | 120,000 | 120,000 | 130,000 | 130,000 | 150,000 | 120,000 | 120,000 | 100,000 | 110,000 | 110,000 | 110,000 | 110,000 | 110,000 | 110,000 | 120,000 |
| deca-BDE #209                                 | 130,000 | 140,000 | 130,000 | 130,000 | 160,000 | 130,000 | 130,000 | 110,000 | 120,000 | 120,000 | 120,000 | 110,000 | 110,000 | 110,000 | 120,000 |
| <b>Homolog groups</b>                         |         |         |         |         |         |         |         |         |         |         |         |         |         |         |         |
| di-BDEs                                       | nd      |
| tri-BDEs                                      | 0.050   | 0.060   | 0.062   | 0.057   | 0.067   | 0.055   | 0.057   | 0.049   | 0.049   | 0.049   | 0.049   | 0.045   | 0.044   | 0.043   | 0.045   |
| tetra-BDEs                                    | 0.077   | 0.10    | 0.098   | 0.092   | 0.11    | 0.083   | 0.083   | 0.074   | 0.075   | 0.071   | 0.091   | 0.075   | 0.071   | 0.075   | 0.073   |
| penta-BDEs                                    | 0.20    | 0.22    | 0.24    | 0.22    | 0.25    | 0.22    | 0.20    | 0.20    | 0.20    | 0.21    | 0.23    | 0.23    | 0.21    | 0.22    | 0.25    |
| hexa-BDEs                                     | 0.66    | 0.81    | 0.81    | 0.72    | 0.88    | 0.70    | 0.81    | 0.75    | 0.71    | 0.74    | 0.82    | 0.66    | 0.73    | 0.79    | 0.82    |
| hepta-BDEs                                    | 280     | 250     | 190     | 200     | 230     | 190     | 470     | 340     | 670     | 480     | 220     | 160     | 120     | 160     | 140     |
| octa-BDEs                                     | 2,900   | 3,200   | 3,100   | 3,300   | 4,000   | 3,200   | 9,500   | 7,000   | 7,600   | 7,200   | 4,200   | 3,400   | 3,400   | 2,900   | 3,000   |
| nona-BDEs                                     | 120,000 | 120,000 | 130,000 | 130,000 | 150,000 | 120,000 | 120,000 | 100,000 | 110,000 | 110,000 | 110,000 | 110,000 | 110,000 | 110,000 | 120,000 |
| deca-BDE                                      | 130,000 | 140,000 | 130,000 | 130,000 | 160,000 | 130,000 | 130,000 | 110,000 | 120,000 | 120,000 | 120,000 | 110,000 | 110,000 | 110,000 | 120,000 |
| <b>Polybrominated dibenzofurans (PBDFs)</b>   |         |         |         |         |         |         |         |         |         |         |         |         |         |         |         |
| di-BDFs 2,8-F                                 | nd      |
| tri-BDFs 2,4,8-F                              | nd      |
| tetra-BDFs 2,3,7,8-F                          | nd      |
| penta-BDFs 2,3,4,7,8-F                        | nd      |
| hexa-BDFs 1,2,3,4,7,8-F                       | nd      | nd      | nd      | nd      | 0.046   | 0.035   | nd      | 0.051   | 0.056   | 0.059   | 0.10    | 0.11    | 0.12    | 0.11    | 0.11    |
| hepta-BDFs 1,2,3,4,6,7,8-F                    | 0.64    | 1.2     | 1.1     | 1.2     | 1.7     | 1.5     | 3.0     | 1.9     | 2.6     | 3.2     | 3.4     | 3.4     | 3.4     | 5.4     | 3.6     |
| octa-BDF 1,2,3,4,6,7,8,9-F                    | 1.7     | 5.8     | 2.8     | 2.8     | 4.4     | 2.8     | 9.1     | 3.5     | 7.1     | 9.2     | 9.6     | 12      | 19      | 18      | 11      |
| <b>Homolog groups</b>                         |         |         |         |         |         |         |         |         |         |         |         |         |         |         |         |
| di-BDFs                                       | nd      | 0.012   | 0.015   | 0.015   | 0.021   | 0.015   |
| tri-BDFs                                      | nd      | 0.014   | 0.020   | 0.029   | 0.052   | 0.061   | 0.078   | 0.11    | 0.10    | 0.10    | 0.18    | 0.26    | 0.18    | 0.21    | 0.24    |
| tetra-BDFs                                    | 0.065   | 0.041   | 0.073   | 0.11    | 0.22    | 0.21    | 0.28    | 0.42    | 0.35    | 0.42    | 0.64    | 0.75    | 0.65    | 0.65    | 0.70    |
| hepta-BDFs                                    | 0.64    | 1.2     | 1.1     | 1.2     | 1.7     | 1.5     | 3.0     | 1.9     | 2.6     | 3.2     | 3.4     | 3.4     | 3.4     | 5.4     | 3.6     |
| octa-BDF                                      | 1.7     | 5.8     | 2.8     | 2.8     | 4.4     | 2.8     | 9.1     | 3.5     | 7.1     | 9.2     | 9.6     | 12      | 19      | 18      | 11      |
| Total PBDFs                                   | 2.4     | 7.3     | 4.3     | 4.6     | 7.1     | 5.2     | 13      | 6.8     | 11      | 14      | 15      | 18      | 27      | 26      | 17      |

nd: not detected at or above the detection limits of the analyses; 5 ng/kg for di- to tetra-BDEs, 10 ng/kg for penta- to hepta-BDEs, 20 ng/kg for octa- and nona-BDEs, 50 ng/kg for deca-BDE, 10 ng/kg for di- to penta-BDFs, and 30 ng/kg for hepta- to octa-BDFs.

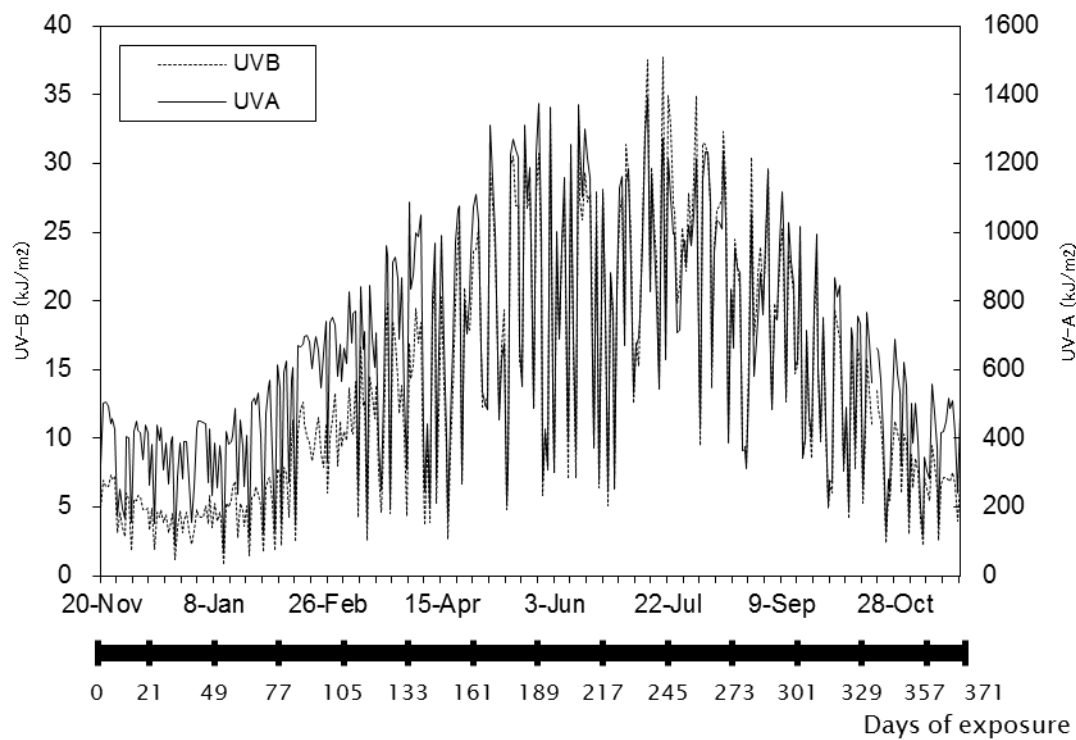

Fig. S1. Daily cumulative UV irradiation during the experiment.

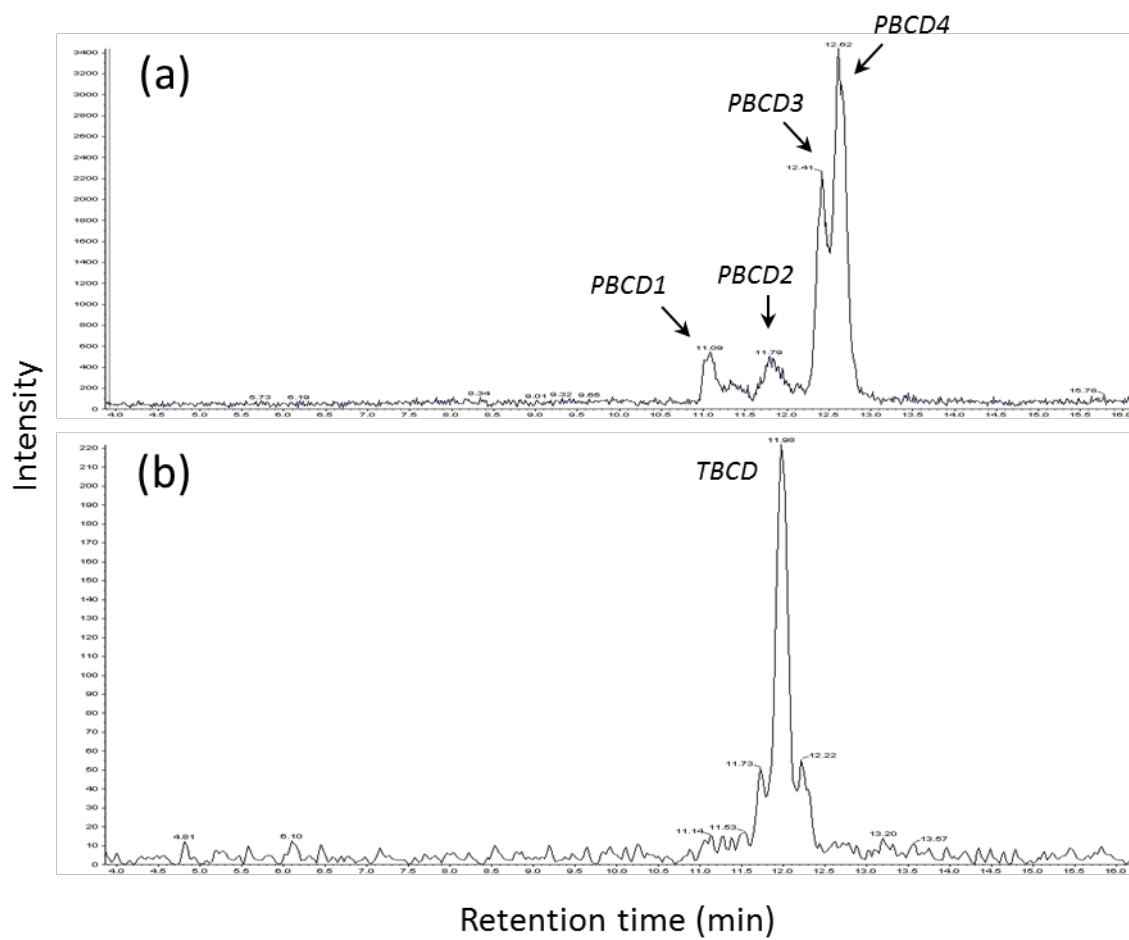

Figure S2. LC/MS/MS chromatograms of (a) PBCDs and (b) TBCD in curtain samples.
